# Supplementary material for: Direct propylene epoxidation on chemically reduced Au nanoparticles supported on titaniaElectronic supplementary information (ESI) available: reactions for catalyst preparation. See http://www.rsc.org/suppdata/cc/b4/b403213f/
Source: Royal Society of Chemistry journal article supplement (doi:10.1039/b403213f), 2004-01-01
Supplement: b403213f.doc [file b403213f.doc]

**Paper B403213F**

**Supplementary Material for Chemical Reactions for Catalyst Preparation**

Au101(PPh3)21Cl5

b NaHB4

c

a

HAuCl4 + 2PPh3 + H2O AuCl(PPh3) + O=PPh3 + 3HCl

Scheme 1. Reaction pathway to nanoparticles **c**. a: Toluene, water, tetraoctylammonium bromide, 5 min, room temperature. b: 10 equiv of sodium borohydride, 3 h, room temperature. c: average empirical formula from ref 12. (All operations are carried out in a fume hood under ambient conditions.)
